# Supplementary material for: A polyurea interface structure with dual dynamic bonds endowing composites with synchronous self-healing and thermal conductivity properties
Source: Royal Society of Chemistry journal article supplement (doi:10.1039/d4tc04088k), 2024-12-06
Supplement: d4tc04088k1.pdf [file d4tc04088k1.pdf]

### Supplementary Information

Polyurea interface structure with dual dynamic bonds endowing  
composites with synchronous self-healing and thermal conductivity

Shuang Geng <sup>a</sup>, Bin Wu <sup>a, \*</sup>, Yan Wu <sup>a</sup>, Ping Yu <sup>b</sup>, Ru Xia <sup>a, \*</sup>, and Jiasheng Qian <sup>a</sup>

<sup>a</sup> Key Laboratory of Environment-Friendly Polymeric Materials of Anhui Province,  
School of Chemistry & Chemical Engineering, Anhui University, Hefei, Anhui, 230601,  
P. R. China.

<sup>b</sup> School of Environmental and Chemical Engineering, Jiangsu Ocean University,  
Lianyungang, Jiangsu, 222005, P. R. China.

\* Corresponding Authors.

E-mail addresses: lwbin@ahu.edu.cn (B. Wu), 96047@ahu.edu.cn (R. Xia).

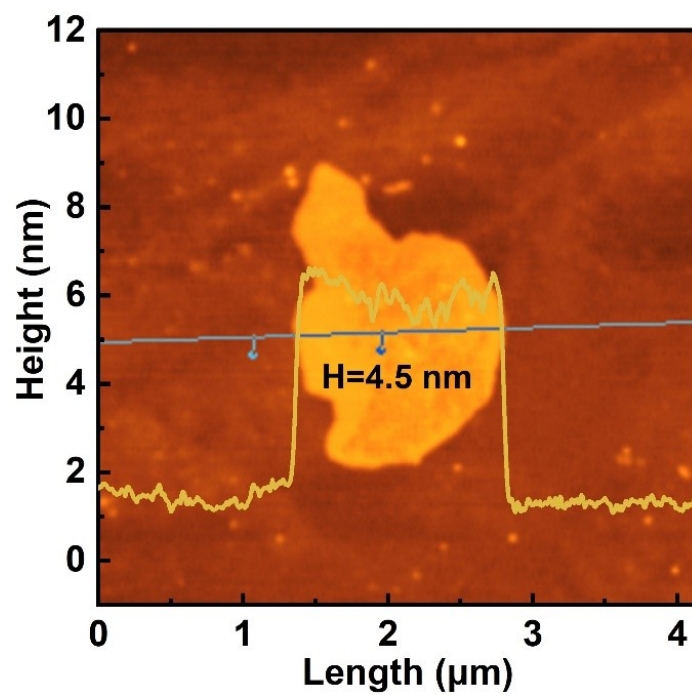

Fig. S1 AFM topographic image and curves of surface scale for GO.

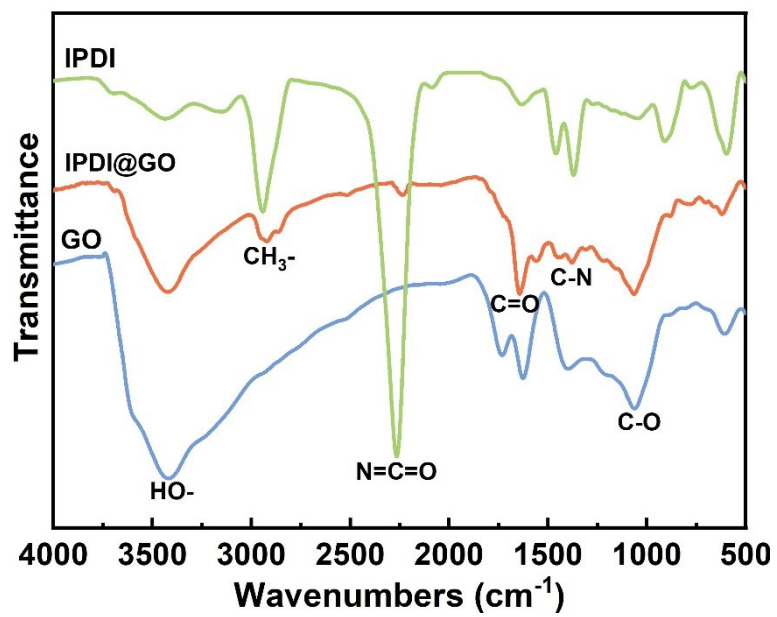

Fig. S2 FT-IR spectrum of GO, IPDI, and IPDI@GO.

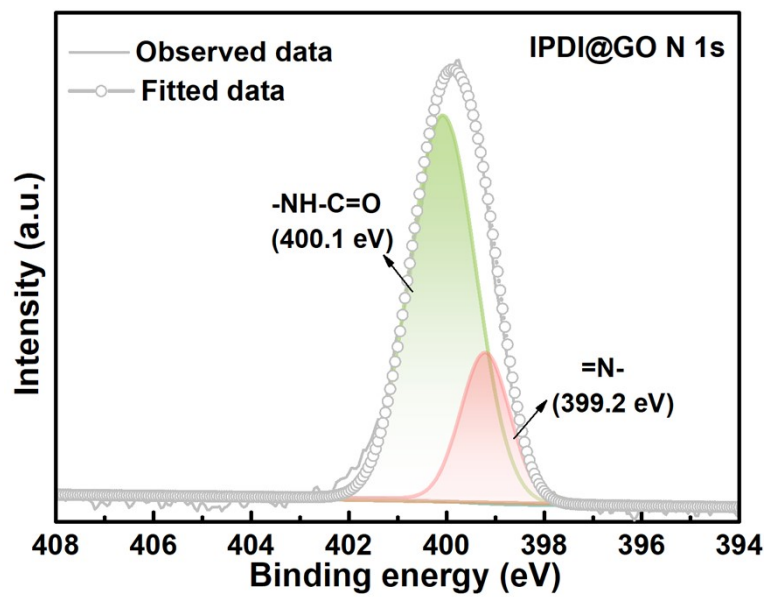

Fig. S3 XPS N1s spectra of IPDI@GO.

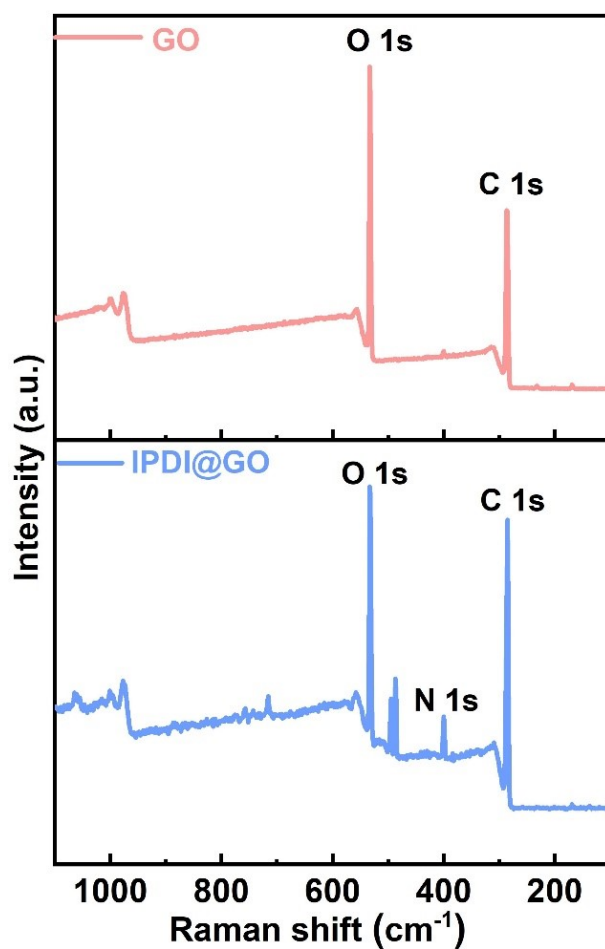

Fig. S4 XPS full spectrums of GO and IPDI@GO.

**Table S1.** Comparison of atomic concentration of C and N in GO and IPDI@GO by the XPS full spectrums.

| Samples | Atomic concentration (%) |      | C/N atomic<br>ration |
|---------|--------------------------|------|----------------------|
|         | C 1s                     | N 1s |                      |
| GO      | 67.87                    | 1.01 | 67.20                |
| IPDI@GO | 72.26                    | 5.29 | 13.66                |

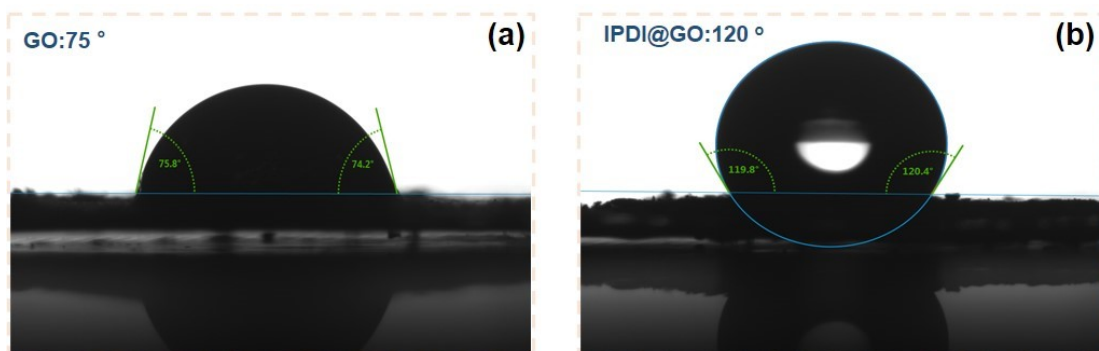

Fig. S5 Contact angles of H<sub>2</sub>O on the surface of GO and IPDI@GO.

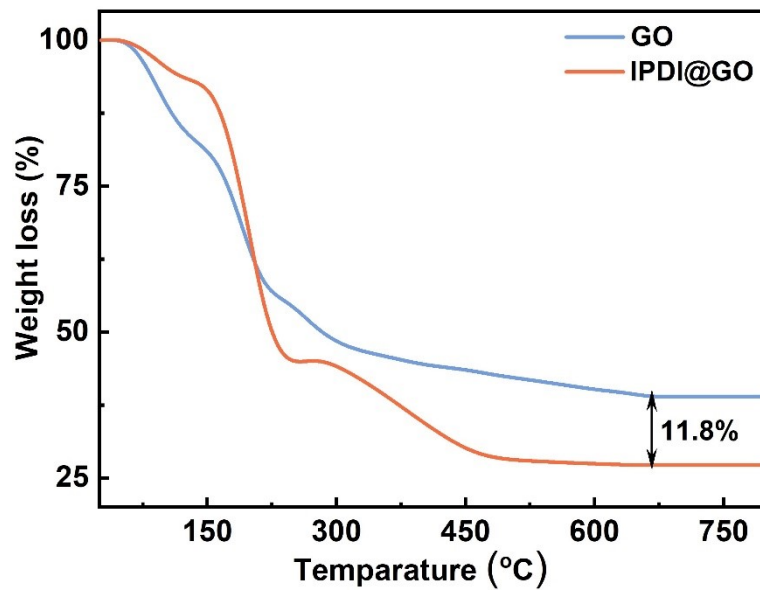

Fig. S6 TGA of GO and IPDI@GO.

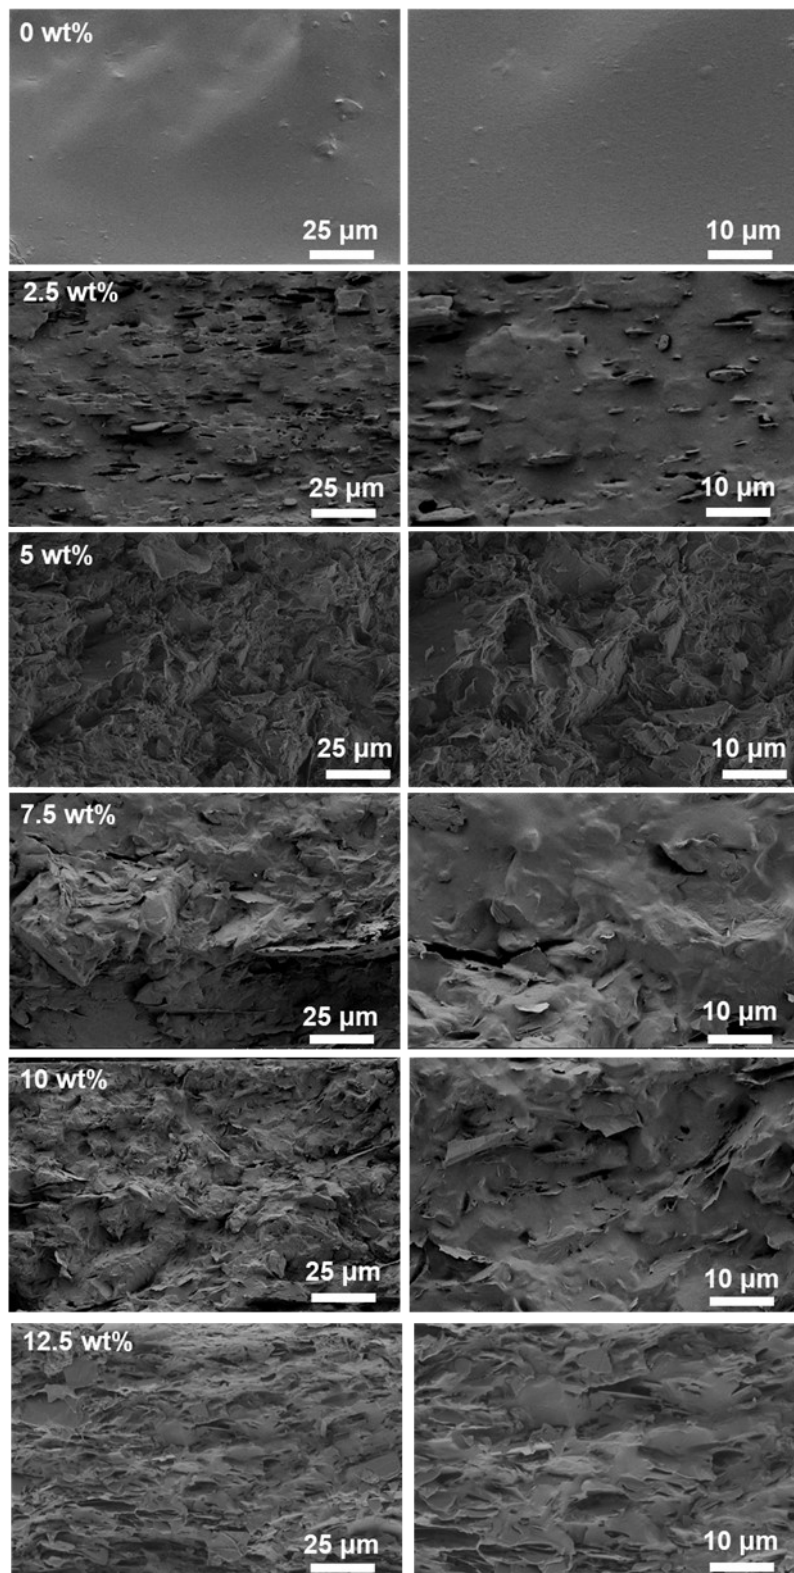

Fig.S7 Cross-sectional SEM images of IPDI@GO<sub>x</sub>/D-PUA (x refers to the mass percentage of the filler content).



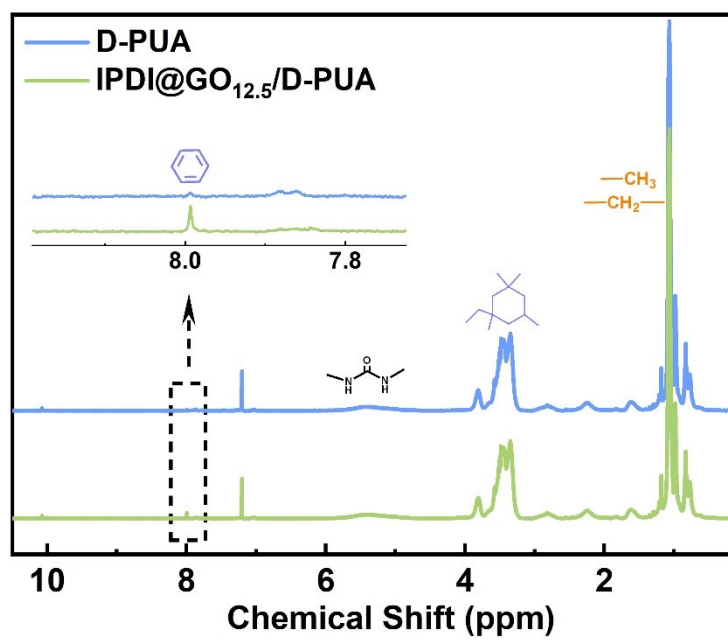

Fig. S8 <sup>1</sup>H NMR of D-PUA and IPDI@GO<sub>12.5</sub>/D-PUA.

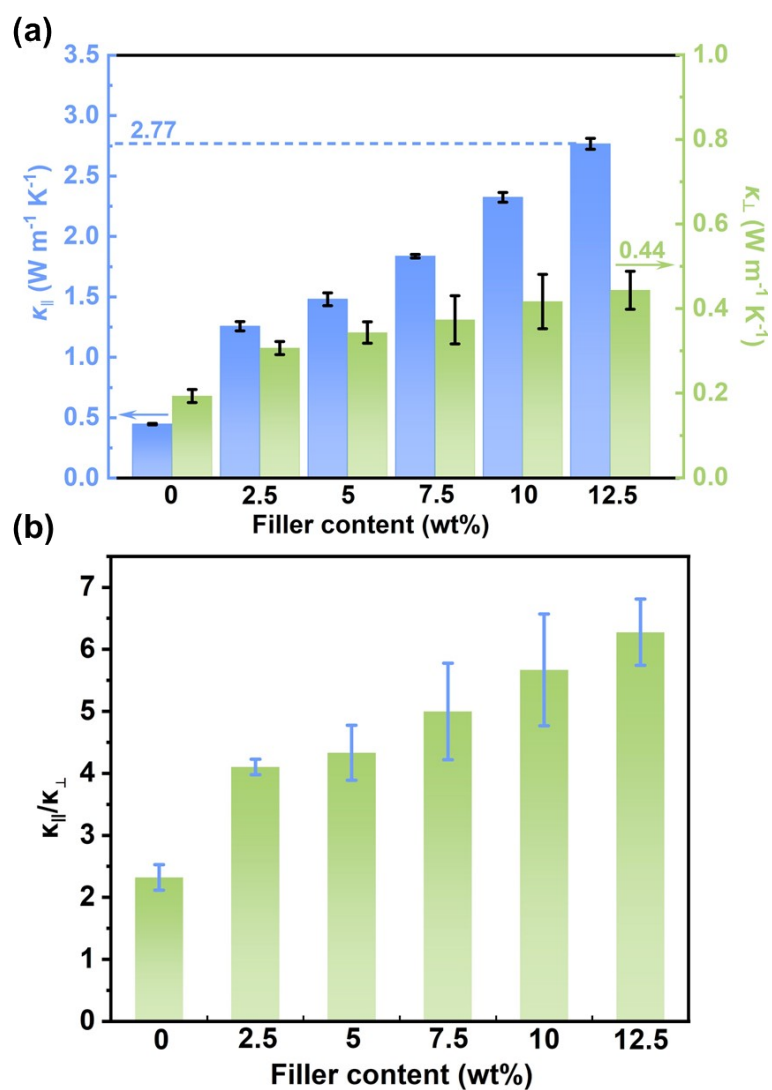

Fig.S9 (a)  $\kappa_{||}$  and  $\kappa_{\perp}$ , (b) Ratio of  $\kappa_{||}$  and  $\kappa_{\perp}$  for IPDI@GO<sub>x</sub>/D-PUA with different filler loading.

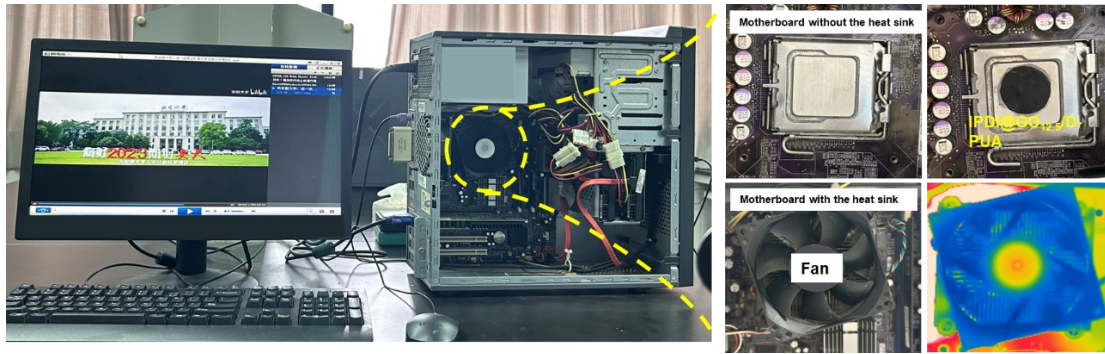

Fig. S10 Experimental setup for comparing the cooling efficiency between IPDI@GO<sub>12.5</sub>/D-PUA and BGS-GP1000 based on desktop computer systems.

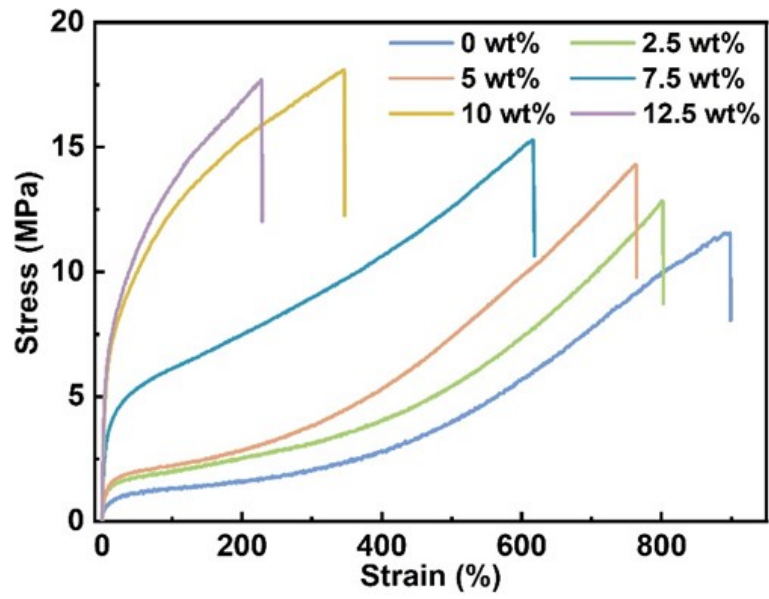

Fig. S11 Stress-strain curves of IPDI@GO<sub>x</sub>/D-PUA with different filler loading.

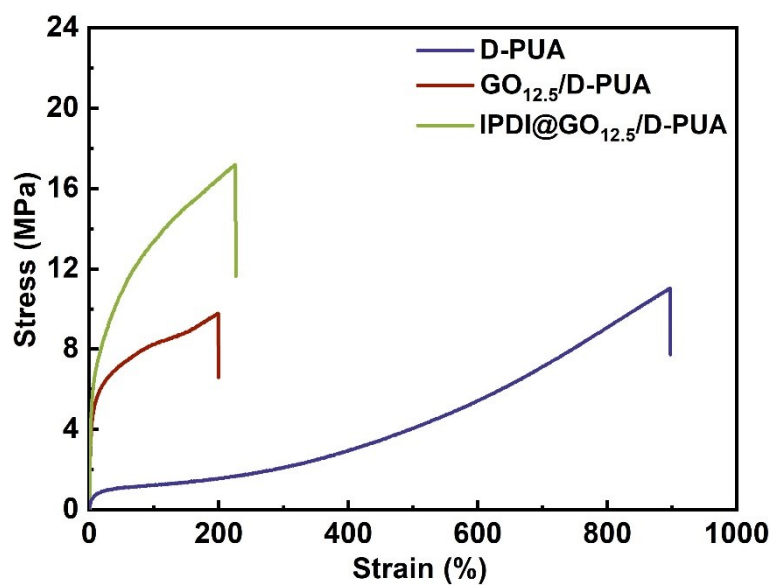

Fig. S12 Stress-strain curves of the D-PUA, GO<sub>12.5</sub>/D-PUA, and IPDI@GO<sub>12.5</sub>/D-PUA.

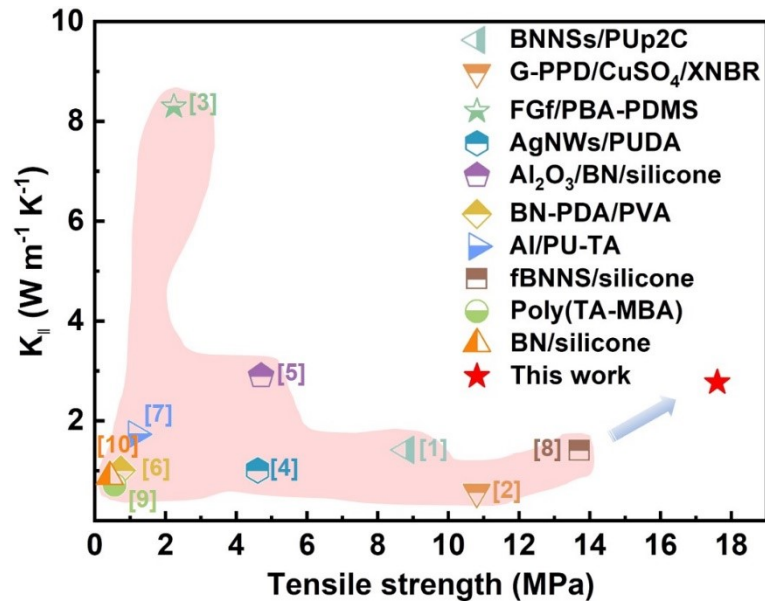

Fig. S13 Comparison of  $\kappa_{||}$  and tensile strength for IPDI@GO<sub>12.5</sub>/D-PUA with previously reported composites [1-10].

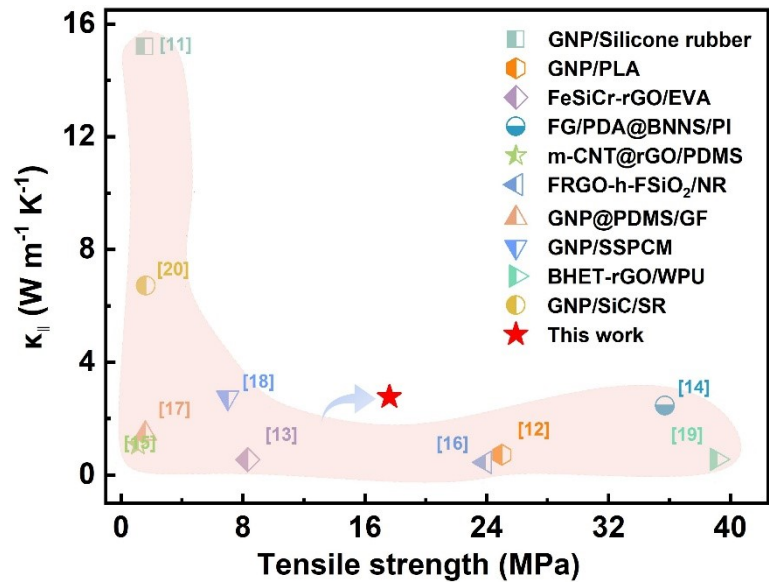

Fig. S14 Comparison of  $\kappa_{||}$  and tensile strength for IPDI@GO<sub>12.5</sub>/D-PUA with previously reported graphene-based nanocomposites [11-20].

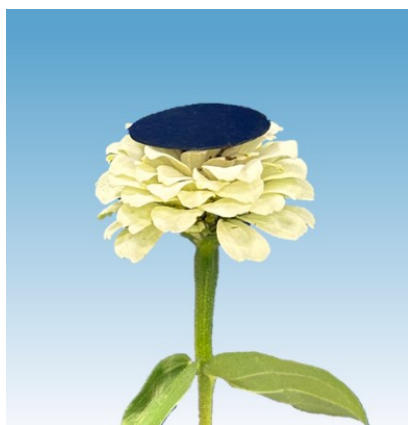

Fig. S15 Digital image of IPDI@GO<sub>12.5</sub>/D-PUA on petal.



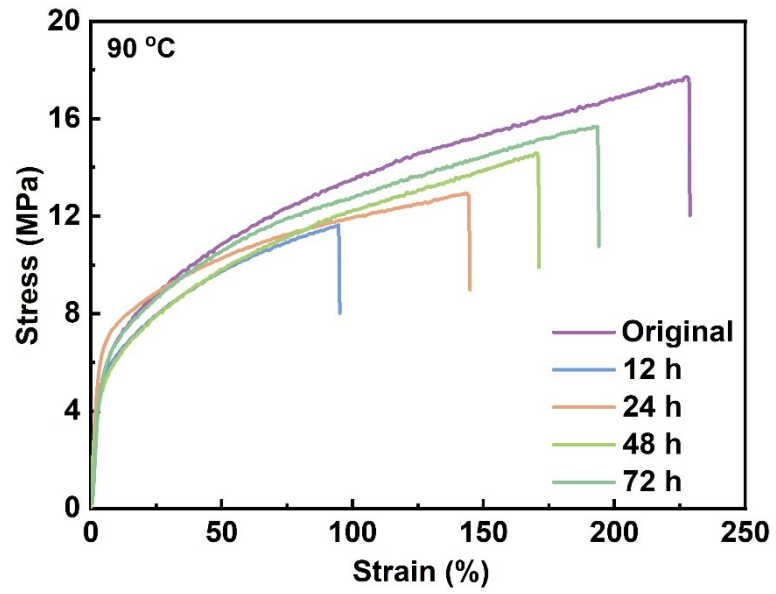

Fig.S16 Stress-strain curves of the IPDI@GO<sub>12.5</sub>/D-PUA at 90 °C for different healing durations (12 h, 24 h, 48 h, and 72 h).

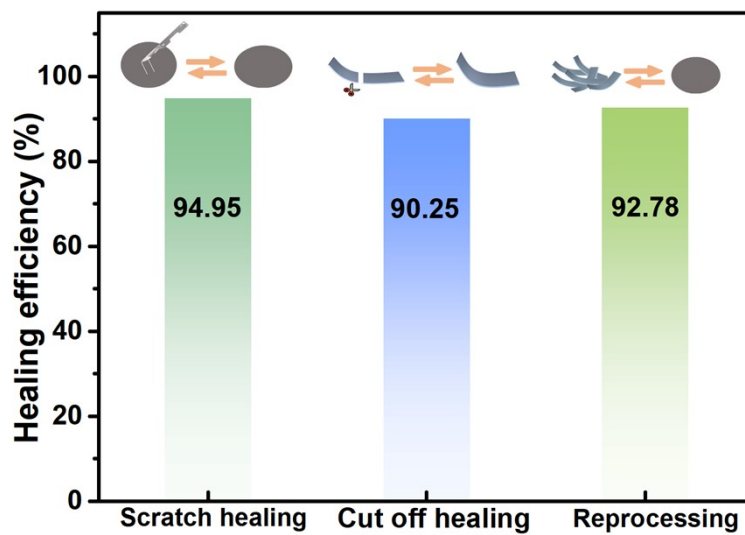

Fig.S17 Healing efficiency of  $\kappa_{||}$  of the IPDI@GO<sub>12.5</sub>/D-PUA after different self-healing processes.

## References

- 1 Z. Wang, X. Gong, J. Xu, J. Wang, Y. Li, X. Ge, G. Xing, G. Pan, *Nanoscale*, 2023, **15**, 13428-13436.
- 2 H. Dong, Y. Zhang. *Compos. Part A Appl. Sci. Manuf.*, 2023, **175**, 107783.
- 3 H. Yu, C. Chen, J. Sun, H. Zhang, Y. Feng, M. Qin, W. Feng, *Nano-Micro Lett.*, 2022, **14**, 135.
- 4 Y. Jiang, Y. Dong, Y. Xiong, J. Li, J. Zhou, H. Liang, H. Zhou, B. Xie, *Colloid. Surface. A*, 2024, **685**, 133291.
- 5 Z. Lin, H. Jin, H. Deng, Z. Zu, H. Huang, L. Zhang, H. Xiang, *Compos. Struct.*, 2024, **332**, 117932.
- 6 Q. Wei, D. Yang, *Compos. Commun.*, 2023, **39**, 101561.
- 7 X. Cheng, M. Zhou, D. He, C. Wong, S. Rao, C. Zhang, L. Ren, R. Sun, X. Zeng, P. Zhang, *Compos. Commun.*, 2024, **45**, 101799.
- 8 L. Zhao, L. Guan, X. Zhang, C. Qu, D. Wang, L. Weng, J. *Colloid Interf. Sci.*, 2022, **620**, 273-83.
- 9 C. Wong, S. Wang, L. Ren, J-B. Xu, X. Zeng, R. Sun, *Adv. Funct. Mater.*, 2024, **34**, 2401157.
- 10 L. Zhao, X. Shi, Y. Yin, B. Jiang, Y. Huang. *Compos. Sci. Technol.*, 2020, **186**, 107919.
- 11 J. Jin, Y. Su, J. Guo, Z. Zhang, B. Peng, M. Chen, L. Wu, *Compos. Part B-Eng.*, 2024, **286**, 111780.
- 12 A. Jalali, M. Kheradmandkeysomi, P. Buahom, T. Gupta, S. Habibpour, H. Omranpour, A. Yu, M. Sain, C. B. Park, *Carbon*, 2024, **226**, 119196.
- 13 S. Xu, D. Li, W. Wang, L. Lin, Y. Sun, J. Li, L. Li, *Polym. Degrad. Stabil.*, 2024, **223**, 110730.
- 14 Y. Zhang, J. W. Wang, Y. J. Ma, Z. L. Zhang, L. Tao, *ACS Appl. Nano Mater.*, 2024, **7**, 5009-5018.
- 15 J. Meng, J. Song, X. Zhang, J. Wang, S. Li, *Compos. Commun.*, 2023, **42**, 101693.
- 16 X. Liu, X. Lv, Q. Tian, N. AlMasoud, Y. Xu, T. S. Alomar, M. Zeinhom, J. Li, A. Hassan, R. Gourisankar, T. Ding, J. Guo, X. Li, *Adv. Compos. Hybrid Ma.*, 2023, **6**, 141.
- 17 S. Anand, M. C. Vu, D. Mani, J. B. Kim, T. H. Jeong, M. A. Islam, S. R. Kim, *Chem. Eng. J.*, 2023, **462**, 142017.
- 18 C. Tian, Y. Yang, Q. Liu, Y. Bai, F. Zhao, L. Huang, N. Yang, X. Cai, W. Kong, *ACS Appl. Mater. Interface*, 2023, **15**, 13165-13175.
- 19 Q. L. H. He, S. Wang, Y. Shen, C. Zhang, X. Liang, *Compos. Commun.*, 2022, **35**, 01343.
- 20 J. Song, X. Zhang, J. Wang, K. Zhang, *Compos. Commun.*, 2022, **34**, 101242.
